# Supplementary material
Source: ML conference proceedings conference paper supplement (https://openaccess.thecvf.com/content/ACCV2022/html/Hu_Learning_to_Predict_ACCV_2022_paper.html)
Supplement: Supplementary file 1 [file Hu_Learning_to_Predict_ACCV_2022_supplemental.pdf]

# Supplemental Material: Learning to Predict Decomposed Dynamic Filters for Single Image Motion Deblurring

Zhiqiang Hu<sup>1</sup> and Tao Yu<sup>2</sup>

<sup>1</sup> Independent Researcher

<sup>2</sup> Tokyo Institute of Technology, Tokyo, Japan

zhiqianghu2021@gmail.com; yutao@mobile.ee.titech.ac.jp

Below are the visualization results we get in GoPro, DND and RealBlur-dataset, respectively.

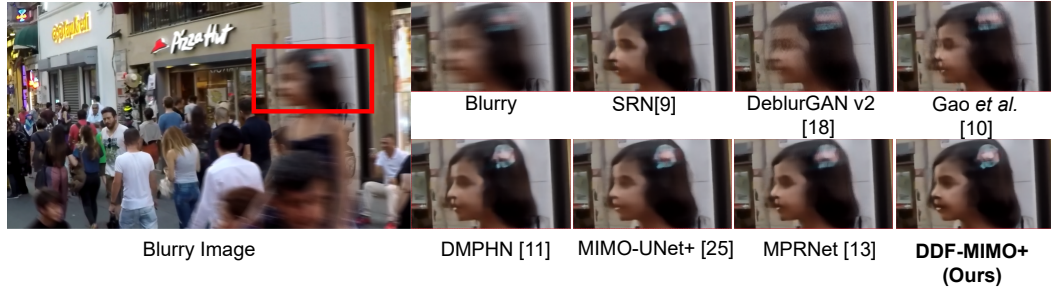

**Fig. 1.** Visual comparisons for the GoPro dataset.

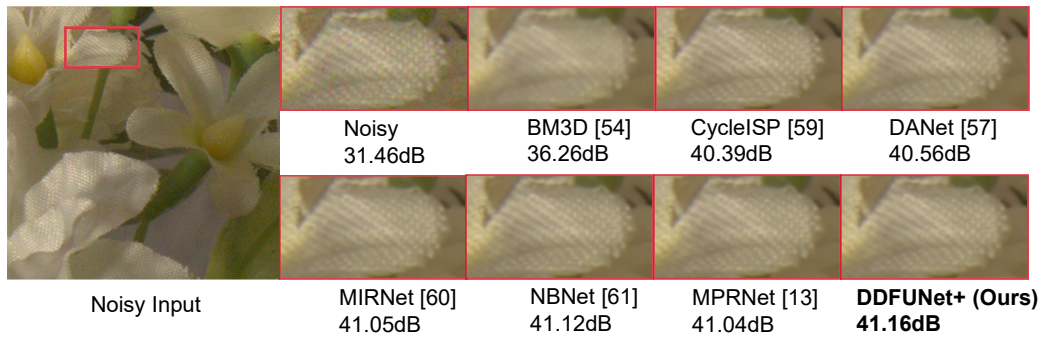

**Fig. 2.** Qualitative comparison of denoising methods on DND benchmark (refer to the Table 3 in the paper).

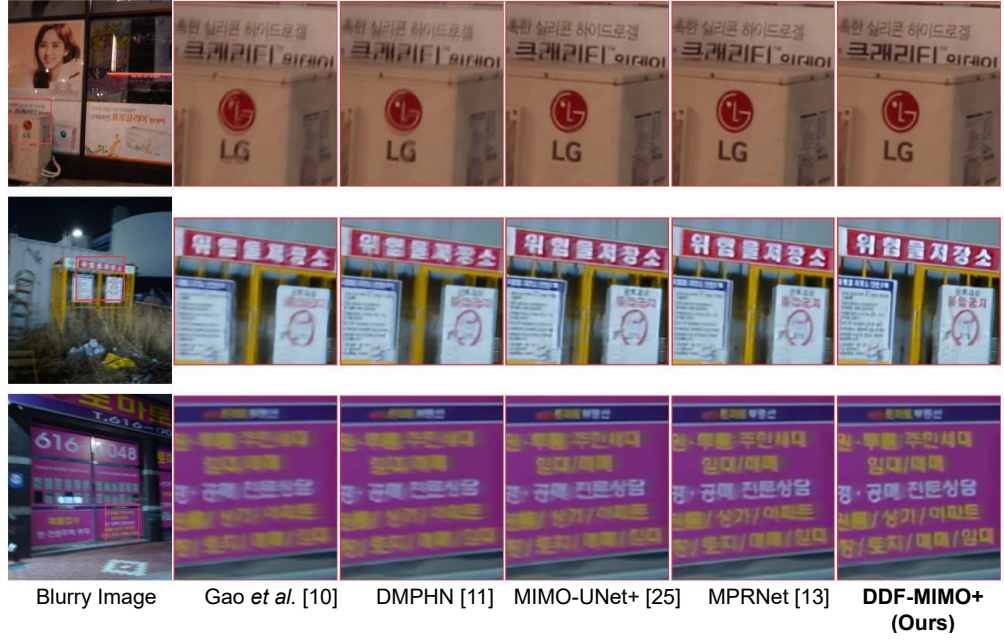

Fig. 3. Visual comparisons for the RealBlurJ dataset.
